# Supplementary material
Source: Springer Nature journal article supplement (https://www.springermedizin.de/resource/supplementary/12967_2011_692_MOESM5_ESM.pdf/9577292)

# SERPINE1 mRNA level in fibroblasts - Hypoxia

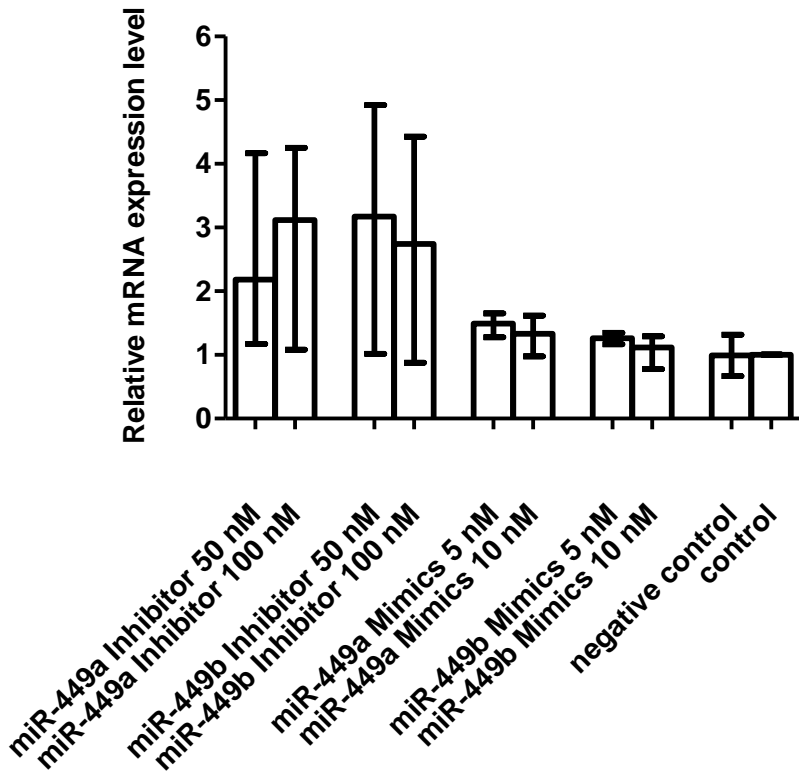

Supplement: MOESM5 [file 9577292]
